# Supplementary material
Source: PubMed Central journal article supplement (PMC1560920)

**A**

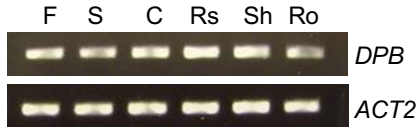

**B**

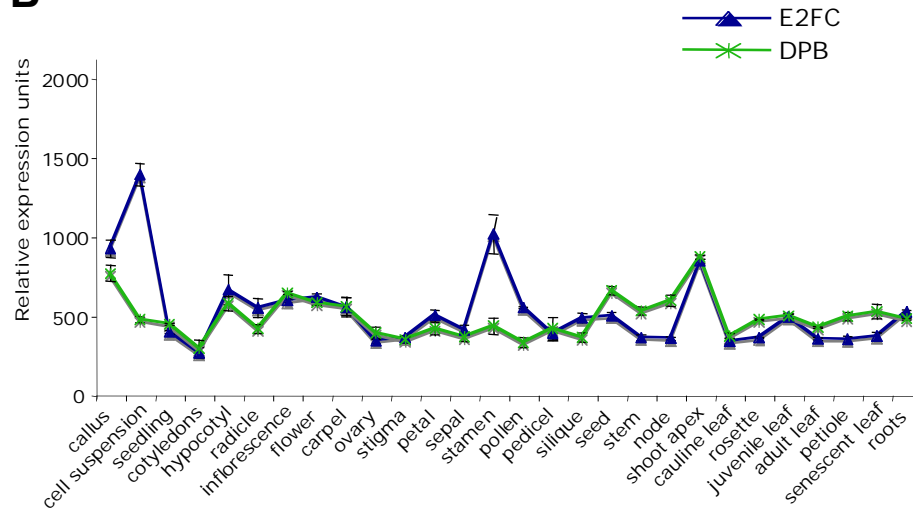

Supplement: plntcell_tpc.105.039651_1.pdf [file plntcell_tpc.105.039651_1.pdf]

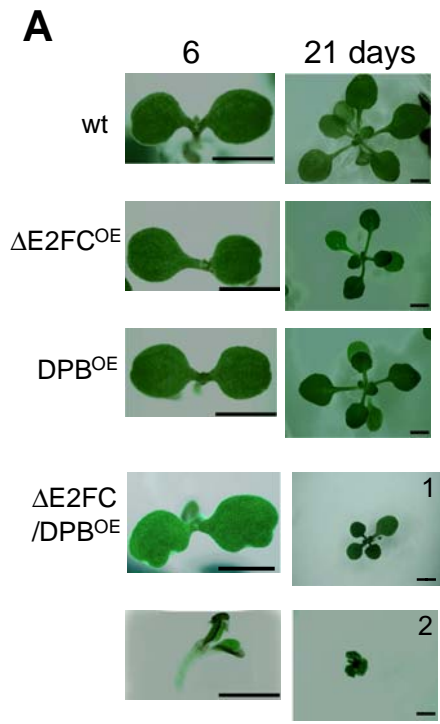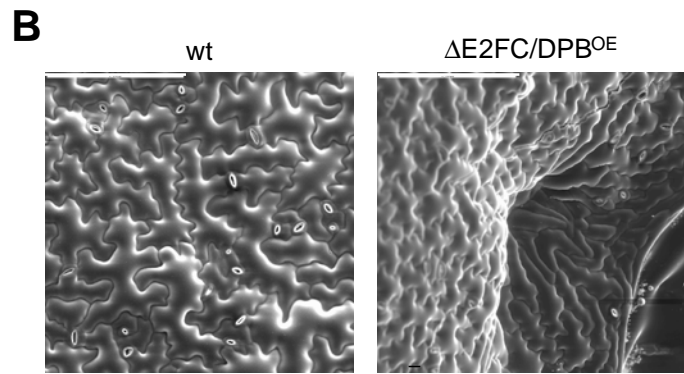

**C**

|            | wt   | $\Delta E2FC \times DPB$ |
|------------|------|--------------------------|
| <b>2C</b>  | 30.5 | 28.0                     |
| <b>4C</b>  | 38.4 | 28.1                     |
| <b>8C</b>  | 25.5 | 28.9                     |
| <b>16C</b> | 5.3  | 14.3                     |
| <b>32C</b> | 0.2  | 0.6                      |
| <b>64C</b> | –    | 0.04                     |

**D**

|            | wt   | $\Delta E2FC \times DPB$ |
|------------|------|--------------------------|
| <b>2C</b>  | 45.5 | 40.9                     |
| <b>4C</b>  | 35.5 | 37.1                     |
| <b>8C</b>  | 13.5 | 10.4                     |
| <b>16C</b> | 4.2  | 7.1                      |
| <b>32C</b> | 1.2  | 3.5                      |
| <b>64C</b> | 0.1  | 0.9                      |

Supplement: plntcell_tpc.105.039651_2.pdf [file plntcell_tpc.105.039651_2.pdf]

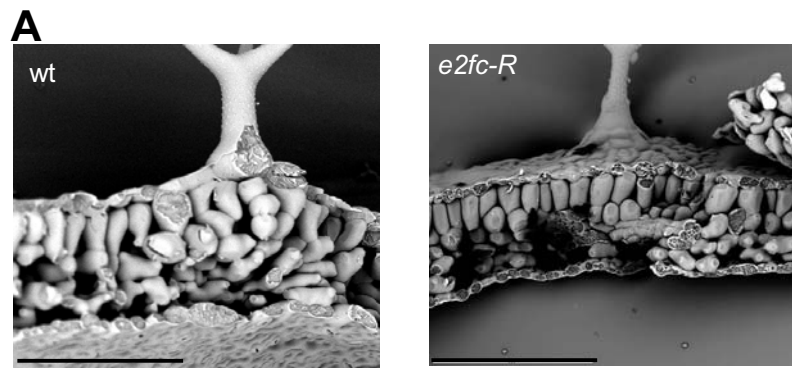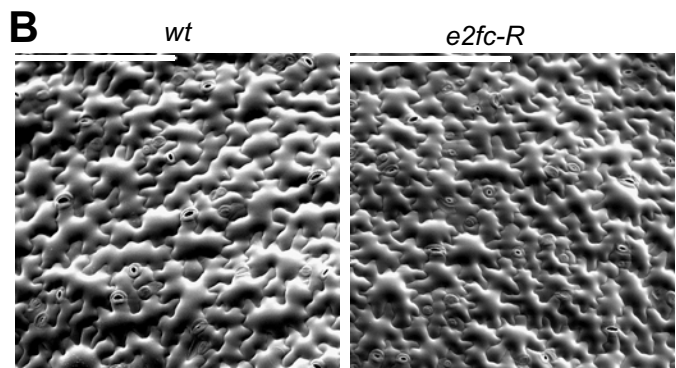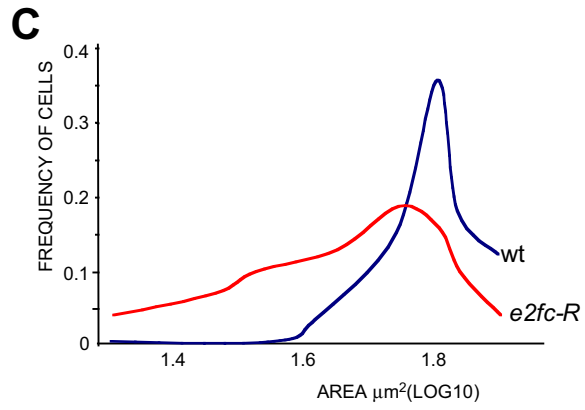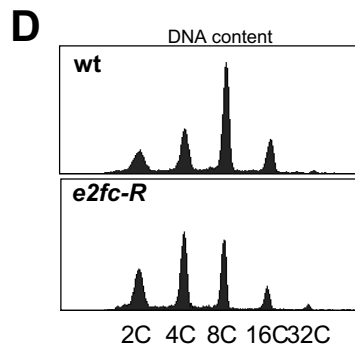

Supplement: plntcell_tpc.105.039651_3.pdf [file plntcell_tpc.105.039651_3.pdf]
